# Supplementary material for: Coordination polymers based on octacyanometalates(iv,v) (M = Mo, W) and aliphatic polyamine copper(ii) tectons with [N3] donor atom sets
Source: Royal Society of Chemistry journal article supplement (doi:10.1039/b306422k), 2003-01-01
Supplement: b306422k.pdf [file b306422k.pdf]

## Supplementary Information

### Coordination polymers based on octacyanometalates(IV,V) and aliphatic polyamine cooper(II) tectons with [N<sub>3</sub>] donor atom sets

R. Podgajny, T. Korzeniak, K. Stadnicka, Y. Dromzée, N. W. Alcock, W. Errington, K. Kruczala, M. Balanda, T. J. Kemp, M. Verdaguer and B. Sieklucka

#### Contents

**Table S1.** The selected donor(D)-H...H-acceptor(A) distances (Å) of possible hydrogen bonds in **3**

**Table S2.** Selected Bond Lengths (Å) and Angles (deg) for [Cu<sup>II</sup>(tetrenH<sub>2</sub>)<sub>2</sub>][W<sup>IV</sup>(CN)<sub>8</sub>]<sub>2</sub>·5H<sub>2</sub>O **1**

**Table S3.** Selected Bond Lengths (Å) and Angles (deg) for [Cu<sup>II</sup>(tetrenH<sub>2</sub>)][Cu<sup>II</sup>(tetrenH)][W<sup>V</sup>(CN)<sub>8</sub>][W<sup>IV</sup>(CN)<sub>8</sub>]<sub>2</sub>·2.5H<sub>2</sub>O **2**

**Table S4.** Selected distances and angles for [Cu(dien)]<sub>2</sub>[W(CN)<sub>8</sub>]<sub>2</sub>·4H<sub>2</sub>O **3**

**Table S5.** Selected distances and angles for [Cu(dien)]<sub>2</sub>[Mo(CN)<sub>8</sub>]<sub>2</sub>·4H<sub>2</sub>O **4**

**Table S6.** The selected donor(D)-acceptor(A) distances (Å) of possible hydrogen bonds in **1**

**Fig. S1.** Electronic spectra of [Cu<sup>II</sup>(tetren)]<sup>2+</sup> at different pH.

**Fig. S2.** The dependence of the intensities of ν(CN) stretching frequencies on the oxidation state of [W(CN)<sub>8</sub>]<sup>n-</sup>.

**Fig. S3.** χ vs. T of **2** and the best fit of Curie-Weiss law. Inset: χ·T vs. T.

**Fig. S4.** The ESR spectra of **1**·3H<sub>2</sub>O and **2**·10.5H<sub>2</sub>O at 77 K.

**Table S1.** The selected donor(D)-H...H-acceptor(A) distances (Å) of possible hydrogen bonds in **3**

| D...A                |       | D...A                  |       |
|----------------------|-------|------------------------|-------|
| O1...N3 <sup>a</sup> | 2.930 | N6 <sup>a</sup> ...O1  | 2.964 |
| O1...N2 <sup>a</sup> | 2.868 | N6 <sup>a</sup> ...N1  | 3.313 |
| O2...N2              | 3.125 | N6 <sup>a</sup> ...O2  | 3.277 |
| O2...N1 <sup>a</sup> | 3.055 | N9A <sup>a</sup> ...N1 | 3.105 |
|                      |       | N9B <sup>a</sup> ...N1 | 3.031 |
|                      |       | N12...O2               | 3.066 |

<sup>a</sup>Atoms obtained by symmetry equivalent operations imposed by P2<sub>1</sub>2<sub>1</sub>2 space group.

**Table S2** Selected Bond Lengths (Å) and Angles (deg) for  $[\text{Cu}^{\text{II}}(\text{tetrenH}_2)_2][\text{W}^{\text{IV}}(\text{CN})_8]_2 \cdot 5\text{H}_2\text{O} \mathbf{1}$

$[\text{W}(1)(\text{CN})_8]^{4-}$  and  $[\text{W}(2)(\text{CN})_8]^{4-}$

|         |          |           |         |              |           |
|---------|----------|-----------|---------|--------------|-----------|
| W1–C11  | 2.16(1)  | C11–N11   | 1.13(1) | W1–C11–N11   | 178.3(9)  |
| W1–C12  | 2.17(1)  | C12–N12   | 1.15(1) | W1–C12–N12   | 176.6(8)  |
| W1–C13  | 2.161(9) | C13–N13   | 1.15(1) | W1–C13–N13   | 178.7(9)  |
| W1–C14a | 2.172(9) | C14a–N14a | 1.13(1) | W1–C14a–N14a | 177.6(9)  |
| W1–C15  | 2.17(1)  | C15–N15   | 1.10(2) | W1–C15–N15   | 178.4(18) |
| W1–C16  | 2.15(1)  | C16–N16   | 1.17(2) | W1–C16–N16   | 177.7(10) |
| W1–C17  | 2.19(1)  | C17–N17   | 1.12(1) | W1–C17–N17   | 178.0(10) |
| W1–C18  | 2.17(1)  | C18–N18   | 1.14(1) | W1–C18–N18   | 178.1(10) |
| W2–C21  | 2.167(9) | C21–N21   | 1.13(1) | W2–C21–N21   | 176.3(8)  |
| W2–C22  | 2.17(1)  | C22–N22   | 1.14(2) | W2–C22–N22   | 179.6(12) |
| W2–C23  | 2.17(1)  | C23–N23   | 1.11(2) | W2–C23–N23   | 176.9(13) |
| W2–C24  | 2.18(1)  | C24–N24   | 1.12(2) | W2–C24–N24   | 178.8(11) |
| W2–C25  | 2.15(1)  | C25–N25   | 1.15(2) | W2–C25–N25   | 175.4(14) |
| W2–C26  | 2.17(1)  | C26–N26   | 1.13(1) | W2–C26–N26   | 179.1(9)  |
| W2–C27  | 2.19(1)  | C27–N27   | 1.13(1) | W2–C27–N27   | 179.3(10) |
| W2–C28  | 2.18(1)  | C28–N28   | 1.11(1) | W2–C28–N28   | 178.4(12) |

$[\text{Cu}(1)(\text{tetrenH}_2)(\text{NC})_2]^{2+}$

|         |          |             |          |             |         |             |          |
|---------|----------|-------------|----------|-------------|---------|-------------|----------|
| Cu1–N14 | 1.977(9) | Cu1–N14–C14 | 171.1(8) |             |         |             |          |
| Cu1–N11 | 2.183(9) | Cu1–N11–C11 | 154.3(8) |             |         |             |          |
| Cu1–N32 | 2.080(8) | N32–Cu1–N34 | 161.6(4) | N33–Cu1–N34 | 83.9(4) | N11–Cu1–N34 | 96.6(4)  |
| Cu1–N33 | 1.998(8) | N33–Cu1–N14 | 159.5(4) | N34–Cu1–N14 | 95.2(4) | N11–Cu1–N14 | 101.8(4) |
| Cu1–N34 | 2.082(9) | N32–Cu1–N14 | 92.5(4)  | N11–Cu1–N32 | 98.2(3) |             |          |
|         |          | N32–Cu1–N33 | 83.0(4)  | N11–Cu1–N33 | 98.6(4) |             |          |

*mer*- $[\text{Cu}(2)(\text{tetrenH}_2)(\text{NC})_3]^+$

|          |          |               |          |              |         |              |         |
|----------|----------|---------------|----------|--------------|---------|--------------|---------|
| Cu2–N21  | 1.960(8) | Cu2–N21–C21   | 175.8(9) |              |         |              |         |
| Cu2–N12  | 2.266(9) | Cu2–N12–C12   | 146.5(8) |              |         |              |         |
| Cu2–N28a | 2.82     | Cu2–N28a–C28a | 148.6    |              |         |              |         |
| Cu2–N42  | 2.069(8) | N12–Cu2–N28a  | 176.5    | N12–Cu2–N44  | 97.4(3) | N28a–Cu2–N44 | 82.7    |
| Cu2–N43  | 2.016(9) | N21–Cu2–N43   | 176.0(4) | N21–Cu2–N42  | 94.1(4) | N28a–Cu2–N21 | 88.7    |
| Cu2–N44  | 2.070(9) | N42–Cu2–N44   | 154.2(3) | N21–Cu2–N44  | 96.9(4) | N43–Cu2–N42  | 83.4(4) |
|          |          | N12–Cu2–N42   | 104.8(3) | N28a–Cu2–N42 | 74.2    | N43–Cu2–N44  | 84.1(4) |
|          |          | N12–Cu2–N43   | 89.1(3)  | N28a–Cu2–N43 | 87.5    | N12–Cu2–N21  | 94.7(3) |

Symmetry equivalent operation: (a)  $-x, -y, -z + 2$ ; the numbers given without the esd values have been read directly from ORTEP.

**Table S3** Selected Bond Lengths (Å) and Angles (deg) for  $[\text{Cu}^{\text{II}}(\text{tetrenH}_2)][\text{Cu}^{\text{II}}(\text{tetrenH})][\text{W}^{\text{V}}(\text{CN})_8][\text{W}^{\text{IV}}(\text{CN})_8]\cdot 2.5\text{H}_2\text{O} \cdot 2$

| <i>W(1) and W(2)</i> |           |              |           |               |           |
|----------------------|-----------|--------------|-----------|---------------|-----------|
| W1–C11               | 2.134(16) | C11–N11      | 1.17(2)   | W1–C11–N11    | 176.9(14) |
| W1–C12               | 2.14(2)   | C12–N12      | 1.16(3)   | W1–C12–N12    | 178.8(19) |
| W1–C13               | 2.184(19) | C13–N13      | 1.11(2)   | W1–C13–N13    | 176.0(17) |
| W1–C14               | 2.11(2)   | C14–N14      | 1.17(3)   | W1–C14–N14    | 178.1(19) |
| W1–C15               | 2.14(2)   | C15–N15      | 1.13(3)   | W1–C15–N15    | 177(2)    |
| W1–C16               | 2.138(18) | C16–N16      | 1.14(3)   | W1–C16–N16    | 177.3(18) |
| W1–C17               | 2.194(19) | C17–N17      | 1.13(2)   | W1–C17–N17    | 178.2(17) |
| W1–C18               | 2.184(19) | C18–N18      | 1.10(2)   | W1–C18–N18    | 173.4(19) |
|                      |           |              |           |               |           |
| W2–C21               | 2.16(2)   | C21–N21      | 1.13(3)   | W2–C21–N21    | 179(2)    |
| W2–C22               | 2.18(2)   | C22–N22      | 1.11(2)   | W2–C22–N22    | 174.5(18) |
| W2–C23               | 2.18(2)   | C23–N23      | 1.13(3)   | W2–C23–N23    | 177.2(18) |
| W2–C24               | 2.143(18) | C24–N24      | 1.15(2)   | W2–C24–N24    | 178.7(17) |
| W2–C25               | 2.16(3)   | C25–N25      | 1.13(3)   | W2–C25–N25    | 177(2)    |
| W2–C26               | 2.18(3)   | C26–N26      | 1.13(3)   | W2–C26–N26    | 179(2)    |
| W2–C27               | 2.16(2)   | C27–N27      | 1.11(3)   | W2–C27–N27    | 176(2)    |
| W2–C28               | 2.18(2)   | C28–N28      | 1.14(3)   | W2–C28–N28    | 179(2)    |
|                      |           |              |           |               |           |
| <i>Cu(3)</i>         |           |              |           |               |           |
| Cu3–N33              | 2.021(16) | Cu1–N11      | 1.971(17) | Cu1–N11–C11   | 167.1(14) |
| Cu3–N34              | 2.036(19) | Cu1–N16a     | 2.431(18) | Cu1–N16a–C16a | 149.6(16) |
| Cu3–N32              | 2.08(2)   | Cu1–N18b     | 2.446(16) | Cu1–N18b–C18b | 175.2(19) |
|                      |           |              |           |               |           |
| N11–Cu3–N33          | 176.1(7)  | N11–Cu3–N32  | 97.1(8)   | N18b–Cu3–N32  | 89.7(8)   |
| N16a–Cu3–N18b        | 175.6(7)  | N11–Cu3–N34  | 94.3(7)   | N18b–Cu3–N33  | 88.9(7)   |
| N32–Cu3–N34          | 167.3(8)  | N16a–Cu3–N32 | 87.8(8)   | N18b–Cu3–N34  | 84.0(7)   |
| N11–Cu3–N16a         | 90.5(6)   | N16a–Cu3–N33 | 87.3(6)   | N32–Cu3–N33   | 86.0(9)   |
| N11–Cu3–N18b         | 93.5(6)   | N16a–Cu3–N34 | 97.7(8)   | N33–Cu3–N34   | 82.8(8)   |
|                      |           |              |           |               |           |
| <i>Cu(4)</i>         |           |              |           |               |           |
| Cu4–N42              | 2.060(16) | Cu4–N12      | 1.944(19) | Cu4–N12–C12   | 172.1(17) |
| Cu4–N43              | 2.019(17) | Cu4–N22      | 2.287(16) | Cu4–N22–C22   | 149.9(18) |
| Cu4–N44              | 2.032(20) | Cu4–N28c     | 3.114(19) | Cu4–N28c–C28c | 148.4     |
|                      |           |              |           |               |           |
| N12–Cu4–N43          | 172.7(7)  | N12–Cu4–N44  | 94.5(8)   | N28c–Cu4–N43  | 90.7(7)   |
| N22–Cu4–N28c         | 174.6(7)  | N22–Cu4–N43  | 90.1(7)   | N28c–Cu4–N44  | 92.4(8)   |
| N42–Cu4–N44          | 158.3(8)  | N22–Cu4–N44  | 94.9(8)   | N43–Cu4–N44   | 86.7(9)   |
| N12–Cu4–N42          | 93.1(7)   | N22–Cu4–N42  | 106.3(6)  | N42–Cu4–N43   | 83.3(8)   |
| N12–Cu4–N28c         | 82.0(8)   | N28c–Cu4–N42 | 68.5(8)   | N12–Cu4–N22   | 97.0(7)   |

Symmetry equivalent operations: (a)  $1 - x, -y, 1 - z$ ; (b)  $x - 1, -y, -z + 1$ ; (c)  $x - 1, y, z$ ; the numbers given without the esd values have been read directly from ORTEP

**Table S4.** Selected distances and angles for [Cu(dien)]<sub>2</sub>[W(CN)<sub>8</sub>]-4H<sub>2</sub>O **3**.

|         |           |             |           |             |          |
|---------|-----------|-------------|-----------|-------------|----------|
| W1-C1   | 2.161(3)  | C1-N1       | 1.151(4)  | N1-C1-W1    | 177.3(3) |
| W1-C2   | 2.162(3)  | C2-N2       | 1.149(5)  | N2-C2-W1    | 177.3(4) |
| W1-C3   | 2.162(3)  | C3-N3       | 1.146(5)  | N3-C3-W1    | 177.7(3) |
| W1-C4   | 2.143(3)  | C4-N4       | 1.153(4)  | N4-C4-W1    | 174.9(3) |
| Cu1-N4  | 1.947(3)  | C4-N4-Cu1   | 161.2(4)  |             |          |
| Cu1-N1a | 2.290(3)  | C1a-N1a-Cu1 | 140.7(3)  |             |          |
| Cu1-N6  | 2.037(5)  | N4-Cu1-N9B  | 167.3(3)  | N1a-Cu1-N9A | 91.6(3)  |
| Cu1-N9A | 2.033(11) | N4-Cu1-N9A  | 166.6(3)  | N1a-Cu1-N9B | 89.1(3)  |
| Cu1-N9B | 2.020(10) | N12-Cu1-N6  | 160.9(3)  | N6-Cu1-N9A  | 75.5(4)  |
| Cu1-N12 | 2.027(6)  | N4-Cu1-N12  | 92.6(2)   | N6-Cu1-N9B  | 93.1(4)  |
|         |           | N4-Cu1-N6   | 94.88(19) | N12-Cu1-N9B | 76.9(3)  |
|         |           | N4-Cu1-N1a  | 99.28(14) | N12-Cu1-N9A | 93.9(3)  |
|         |           | N6-Cu1-N1a  | 99.71(18) |             |          |
|         |           | N12-Cu1-N1a | 96.4(2)   |             |          |

Symmetry equivalent operation: (a)  $-x+1/2, y+1/2, -z$ .

**Table S5.** Selected distances and angles for [Cu(dien)]<sub>2</sub>[Mo(CN)<sub>8</sub>]-4H<sub>2</sub>O **4**.

|          |          |              |           |              |            |
|----------|----------|--------------|-----------|--------------|------------|
| Mo1-C1   | 2.157(2) | C1-N1        | 1.151(3)  | N1-C1-Mo1    | 177.3(3)   |
| Mo1-C2   | 2.161(3) | C2-N2        | 1.149(4)  | N2-C2-Mo1    | 177.3(4)   |
| Mo1-C3   | 2.162(3) | C3-N3        | 1.155(4)  | N3-C3-Mo1    | 177.7(3)   |
| Mo1-C4   | 2.149(2) | C4-N4        | 1.147(3)  | N4-C4-Mo1    | 174.9(3)   |
| Cu1-N4   | 1.949(2) | C4-N4-Cu1    | 161.5(3)  |              |            |
| Cu1-N1a  | 2.291(2) | C1a-N1a-Cu1  | 140.7(2)  |              |            |
| Cu1-N6A  | 2.165(6) | N6A-Cu1-N12B | 169.8(2)  | N1a-Cu1-N6A  | 98.23(16)  |
| Cu1-N6B  | 1.841(7) | N6A-Cu1-N12A | 156.0(3)  | N1a-Cu1-N6B  | 101.6(2)   |
| Cu1-N9A  | 2.021(5) | N6B-Cu1-N12A | 146.6(3)  | N1a-Cu1-N12A | 102.5(3)   |
| Cu1-N9B  | 2.017(5) | N6B-Cu1-N12B | 161.0(3)  | N1a-Cu1-N12B | 91.7(2)    |
| Cu1-N12A | 1.885(7) | N6A-Cu1-N9A  | 80.2(2)   | N1a-Cu1-N9A  | 92.18(14)  |
| Cu1-N12B | 2.174(7) | N6A-Cu1-N9B  | 97.9(2)   | N1a-Cu1-N9B  | 89.27(15)  |
|          |          | N6B-Cu1-N9A  | 69.2(3)   | N4a-Cu1-N6A  | 90.87(17)  |
|          |          | N6B-Cu1-N9B  | 86.9(3)   | N4a-Cu1-N6B  | 101.1(2)   |
|          |          | N9A-Cu1-N12A | 87.0(3)   | N4a-Cu1-N12A | 97.6(2)    |
|          |          | N9A-Cu1-N12B | 97.0(2)   | N4a-Cu1-N12B | 90.0(2)    |
|          |          | N9B-Cu1-N12A | 70.6(3)   | N4a-Cu1-N9A  | 166.41(16) |
|          |          | N9B-Cu1-N12B | 79.6(2)   | N4a-Cu1-N9B  | 166.81(16) |
|          |          | N4-Cu1-N1a   | 99.26(10) |              |            |

Symmetry equivalent operation: (a)  $-x+1/2, y+1/2, -z$ .

**Table S6.** The selected donor(D)-acceptor(A) distances (Å) of possible hydrogen bonds in **1**

| D...A                 |       | D...A                  |       | D...A                  |       |
|-----------------------|-------|------------------------|-------|------------------------|-------|
| O1...N16 <sup>a</sup> | 2.948 | N31...N13              | 2.925 | N41...N17 <sup>a</sup> | 3.015 |
| O1...N24 <sup>a</sup> | 3.202 | N31...N26              | 3.045 | N41...N22              | 2.926 |
| O1...N27 <sup>a</sup> | 3.160 | N31...N27              | 3.202 | N41...N26 <sup>a</sup> | 2.920 |
| O2...N11              | 3.303 | N31...N27 <sup>a</sup> | 2.884 | N41...O3               | 3.132 |
| O2...N18              | 3.219 | N31...O1               | 3.097 | N42...N28 <sup>a</sup> | 3.010 |
| O2...N18 <sup>a</sup> | 2.868 | N32...O1               | 2.922 | N43...N12              | 3.009 |
| O3...N17 <sup>a</sup> | 3.322 | N33...O2               | 2.969 | N44...N12              | 3.261 |
| O4...N25 <sup>a</sup> | 3.102 | N35...N22 <sup>a</sup> | 3.290 | N44...N25 <sup>a</sup> | 3.258 |
| O4...N28              | 2.807 | N35...N23              | 3.005 | N44...N28 <sup>a</sup> | 3.281 |
| O5...N16              | 2.899 | N35...N26 <sup>a</sup> | 3.211 | N45...N15 <sup>a</sup> | 2.923 |
| O5...N24              | 2.759 |                        |       | N45...N25 <sup>a</sup> | 3.021 |
|                       |       |                        |       | N45...O4               | 2.823 |
|                       |       |                        |       | N45...O5               | 3.036 |

<sup>a</sup>Atoms obtained by symmetry equivalent operations imposed by P-1 space group

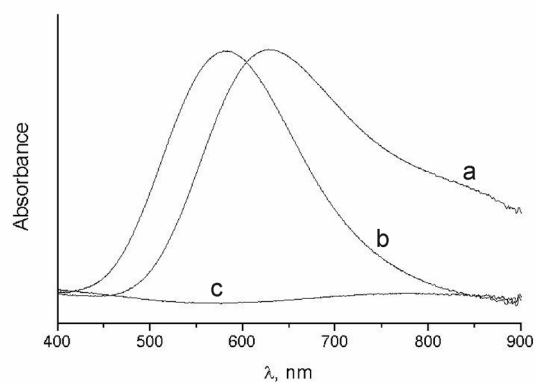

**Fig. S1.** Electronic spectra of  $[\text{Cu}^{\text{II}}(\text{tetren})]^{2+}$  at different pH: (a)  $[\text{Cu}^{\text{II}}(\text{tetren})]^{2+}$  at  $\text{pH} > 6$ , (b)  $[\text{N}_3]$  chelation forms ( $[\text{Cu}^{\text{II}}(\text{tetrenH}_2)]^{4+}$  and/or  $[\text{Cu}^{\text{II}}(\text{tetrenH})]^{3+}$ ) at  $\text{pH} 3\text{--}5$ , and (c)  $[\text{Cu}(\text{OH}_2)_6]^{2+}$  ( $\text{pH} < 2$ ).

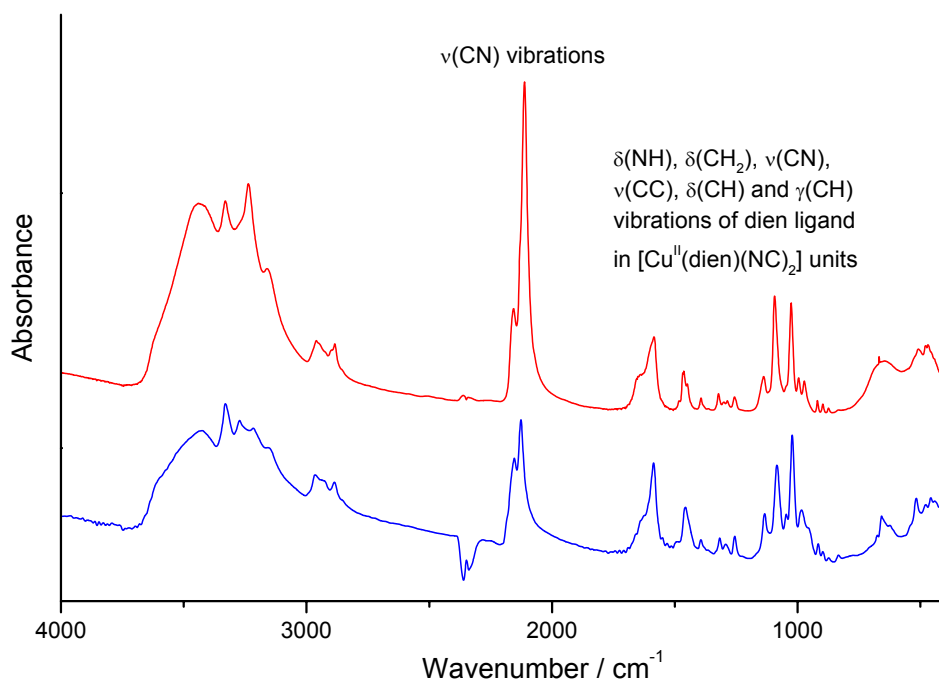

**Fig. S2.** The dependence of the intensities of ν(CN) stretching frequencies on the oxidation state of octacyanotungstate moiety. A comparison of relative absorbance of ν(CN) bands (2200-2000 cm<sup>-1</sup>) vs δ(NH), δ(CH<sub>2</sub>), ν(CN), ν(CC), δ(CH<sub>2</sub>) and γ(CH) bands characteristic of dien ligand (1700-850 cm<sup>-1</sup>) in [Cu<sup>II</sup>(dien)(NC)<sub>2</sub>] units in cyano-bridged compounds of W(IV) and W(V): [Cu<sup>II</sup>(dien)<sub>2</sub>][W<sup>IV</sup>(CN)<sub>8</sub>]·4H<sub>2</sub>O **3** (red, this work) and K[Cu<sup>II</sup>(dien)<sub>4</sub>][W<sup>V</sup>(CN)<sub>8</sub>]<sub>3</sub>·8H<sub>2</sub>O (blue, ref. 6 in this work).



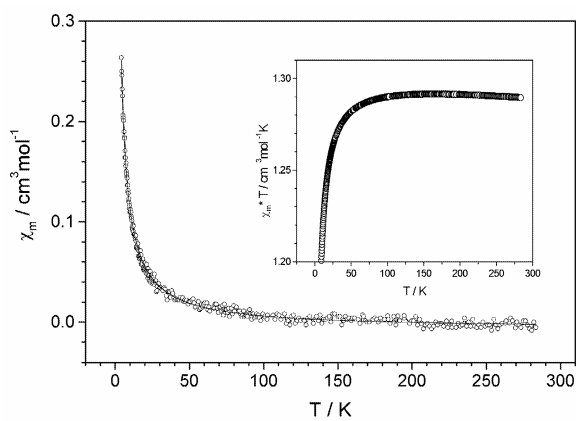

**Fig. S3.** The temperature dependence of molar magnetic susceptibility of **2** and the best fit of Curie-Weiss law. Inset: the temperature dependence of product  $\chi \cdot T$ .

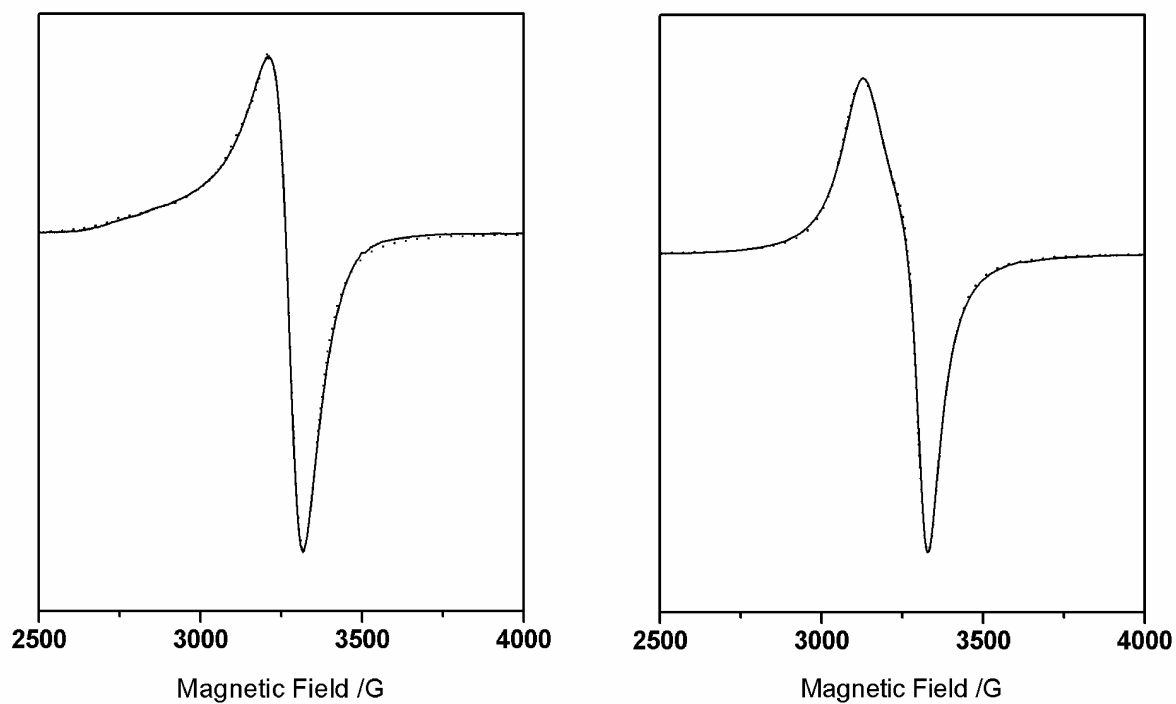

**Fig. S4.** The ESR spectra of  $1 \cdot 3\text{H}_2\text{O}$  (left) and  $2 \cdot 10.5\text{H}_2\text{O}$  (right) at 77 K; (—) – the experimental line, (· · ·) – the simulated line.
